# Supplementary material
Source: MDPI journal article supplement (https://www.mdpi.com/2076-3298/9/7/81)
Supplement: s1 [file s1]

## Supplementary materials

**Table S1.** Bioaccumulation results (mean  $\pm$  dev. std.) of metals (As, Ba, Cd, Cr, Fe) in *R. philippinarum*

| Phase | Month   | Sample | As    |       |      | Ba    |       |      | Cd    |       |      | Cr    |       |      | Fe      |       |        |
|-------|---------|--------|-------|-------|------|-------|-------|------|-------|-------|------|-------|-------|------|---------|-------|--------|
|       |         |        | mg/kg |       |      | mg/kg |       |      | mg/kg |       |      | mg/kg |       |      | mg/kg   |       |        |
| AO    | Nov '05 | L016V  | 7.61  | $\pm$ | 1.16 | 6.23  | $\pm$ | 0.77 | 0.67  | $\pm$ | 0.08 | 4.97  | $\pm$ | 0.96 | 1099.80 | $\pm$ | 139.93 |
|       |         | L017V  | 14.58 | $\pm$ | 0.43 | 13.27 | $\pm$ | 0.58 | 0.95  | $\pm$ | 0.13 | 10.80 | $\pm$ | 1.61 | 1529.15 | $\pm$ | 189.73 |
|       |         | L022V  | 14.04 | $\pm$ | 1.92 | 18.68 | $\pm$ | 1.96 | 1.21  | $\pm$ | 0.14 | 10.75 | $\pm$ | 1.28 | 1365.77 | $\pm$ | 266.24 |
|       |         | L023V  | 18.36 | $\pm$ | 2.35 | 16.84 | $\pm$ | 1.82 | 1.40  | $\pm$ | 0.19 | 11.12 | $\pm$ | 1.26 | 1722.59 | $\pm$ | 276.30 |
|       | Feb '06 | L016V  | 14.50 | $\pm$ | 0.96 | 8.01  | $\pm$ | 1.37 | 1.15  | $\pm$ | 0.24 | 4.35  | $\pm$ | 0.60 | 936.13  | $\pm$ | 127.74 |
|       |         | L017V  | 10.13 | $\pm$ | 0.88 | 8.75  | $\pm$ | 1.08 | 0.67  | $\pm$ | 0.14 | 4.57  | $\pm$ | 0.78 | 1151.70 | $\pm$ | 47.76  |
|       |         | L022V  | 38.30 | $\pm$ | 5.21 | 7.23  | $\pm$ | 1.49 | 0.92  | $\pm$ | 0.13 | 3.72  | $\pm$ | 0.66 | 954.13  | $\pm$ | 148.50 |
|       |         | L023V  | 25.05 | $\pm$ | 4.67 | 5.14  | $\pm$ | 1.00 | 0.98  | $\pm$ | 0.17 | 3.79  | $\pm$ | 0.72 | 847.13  | $\pm$ | 148.51 |
|       | Apr '06 | L016V  | 5.63  | $\pm$ | 1.09 | 4.31  | $\pm$ | 0.95 | 0.37  | $\pm$ | 0.05 | 3.90  | $\pm$ | 0.80 | 648.46  | $\pm$ | 130.67 |
|       |         | L017V  | 7.99  | $\pm$ | 1.54 | <2    |       |      | 0.45  | $\pm$ | 0.02 | 2.96  | $\pm$ | 0.59 | 480.31  | $\pm$ | 84.62  |
|       |         | L022V  | 10.74 | $\pm$ | 1.66 | <2    |       |      | 0.47  | $\pm$ | 0.06 | 2.97  | $\pm$ | 0.39 | 334.89  | $\pm$ | 40.62  |
|       |         | L023V  | 6.36  | $\pm$ | 1.27 | <2    |       |      | 0.36  | $\pm$ | 0.07 | 7.44  | $\pm$ | 1.34 | 588.49  | $\pm$ | 120.48 |
|       | Jul '06 | L016V  | 8.40  | $\pm$ | 2.14 | 2.61  | $\pm$ | 0.43 | 0.48  | $\pm$ | 0.05 | 4.03  | $\pm$ | 0.74 | 927.14  | $\pm$ | 172.33 |
|       |         | L017V  | <2    |       |      | <2    |       |      | 0.43  | $\pm$ | 0.07 | 2.80  | $\pm$ | 0.65 | 623.16  | $\pm$ | 132.93 |
|       |         | L022V  | 14.34 | $\pm$ | 0.56 | <2    |       |      | 0.58  | $\pm$ | 0.06 | 3.28  | $\pm$ | 0.46 | 757.62  | $\pm$ | 184.64 |
|       |         | L023V  | 10.20 | $\pm$ | 0.92 | <2    |       |      | 0.56  | $\pm$ | 0.01 | 2.23  | $\pm$ | 0.43 | 467.89  | $\pm$ | 74.20  |
| IO    | Nov '06 | L016V  | 27.04 | $\pm$ | 2.44 | 2.29  | $\pm$ | 0.16 | 0.56  | $\pm$ | 0.06 | 3.58  | $\pm$ | 0.41 | 897.44  | $\pm$ | 51.59  |
|       |         | L017V  | 23.58 | $\pm$ | 2.97 | 5.57  | $\pm$ | 0.57 | 0.44  | $\pm$ | 0.06 | 6.38  | $\pm$ | 0.70 | 1562.49 | $\pm$ | 172.45 |
|       |         | L022V  | 19.35 | $\pm$ | 0.86 | 4.23  | $\pm$ | 0.45 | 0.59  | $\pm$ | 0.06 | 5.59  | $\pm$ | 0.64 | 1509.42 | $\pm$ | 157.52 |
|       |         | L023V  | 28.55 | $\pm$ | 2.83 | 2.91  | $\pm$ | 0.27 | 0.64  | $\pm$ | 0.07 | 3.06  | $\pm$ | 0.21 | 963.74  | $\pm$ | 119.92 |
|       | Feb '07 | L016V  | 17.22 | $\pm$ | 1.59 | 7.58  | $\pm$ | 0.59 | 0.97  | $\pm$ | 0.09 | 6.36  | $\pm$ | 0.71 | 1748.92 | $\pm$ | 226.59 |
|       |         | L017V  | 22.94 | $\pm$ | 1.63 | 5.52  | $\pm$ | 0.64 | 1.08  | $\pm$ | 0.08 | 5.19  | $\pm$ | 0.54 | 1357.47 | $\pm$ | 144.82 |
|       |         | L022V  | 16.85 | $\pm$ | 1.16 | 4.90  | $\pm$ | 0.22 | 1.07  | $\pm$ | 0.13 | 6.34  | $\pm$ | 0.60 | 1515.35 | $\pm$ | 163.23 |
|       |         | L023V  | 13.92 | $\pm$ | 1.31 | 2.02  | $\pm$ | 0.18 | 0.82  | $\pm$ | 0.07 | 5.14  | $\pm$ | 0.29 | 1506.79 | $\pm$ | 151.17 |
|       | Jun '08 | L016V  | 16.67 | $\pm$ | 3.23 | 4.74  | $\pm$ | 1.55 | 0.03  | $\pm$ | 0.01 | 3.52  | $\pm$ | 0.54 | 685.49  | $\pm$ | 153.30 |
|       |         | L017V  | 8.38  | $\pm$ | 8.72 | 4.92  | $\pm$ | 0.79 | 0.03  | $\pm$ | 0.01 | 4.55  | $\pm$ | 0.62 | 978.10  | $\pm$ | 154.34 |
|       |         | L022V  | 21.05 | $\pm$ | 0.43 | 3.32  | $\pm$ | 0.21 | 0.04  | $\pm$ | 0.01 | 5.03  | $\pm$ | 0.34 | 1025.91 | $\pm$ | 76.70  |
|       |         | L023V  | 15.22 | $\pm$ | 2.37 | 4.76  | $\pm$ | 0.27 | 0.03  | $\pm$ | 0.01 | 4.00  | $\pm$ | 0.27 | 966.90  | $\pm$ | 34.47  |
|       | Nov '08 | L016V  | 5.55  | $\pm$ | 0.30 | 4.53  | $\pm$ | 0.44 | 0.34  | $\pm$ | 0.04 | 4.02  | $\pm$ | 0.62 | 794.52  | $\pm$ | 90.60  |
|       |         | L017V  | 5.04  | $\pm$ | 0.37 | 3.97  | $\pm$ | 0.38 | 0.32  | $\pm$ | 0.03 | 1.50  | $\pm$ | 0.15 | 531.91  | $\pm$ | 55.48  |
|       |         | L022V  | 5.63  | $\pm$ | 0.24 | 6.43  | $\pm$ | 0.75 | 0.48  | $\pm$ | 0.05 | 3.80  | $\pm$ | 0.43 | 892.69  | $\pm$ | 92.49  |
|       |         | L023V  | 5.12  | $\pm$ | 0.35 | 5.49  | $\pm$ | 0.49 | 0.34  | $\pm$ | 0.04 | 2.84  | $\pm$ | 0.29 | 716.00  | $\pm$ | 69.16  |
| PO    | Nov '10 | L016V  | 30.70 | $\pm$ | 1.55 | <2    |       |      | 0.85  | $\pm$ | 0.10 | <1    |       |      | 784.82  | $\pm$ | 82.03  |
|       |         | L017V  | 21.02 | $\pm$ | 0.80 | <2    |       |      | 0.67  | $\pm$ | 0.07 | 5.96  | $\pm$ | 0.65 | 1058.65 | $\pm$ | 120.87 |
|       |         | L022V  | 30.02 | $\pm$ | 3.15 | 7.22  | $\pm$ | 0.97 | 0.69  | $\pm$ | 0.06 | <1    |       |      | 1108.11 | $\pm$ | 127.68 |
|       |         | L023V  | 29.19 | $\pm$ | 1.42 | 5.14  | $\pm$ | 0.12 | 0.57  | $\pm$ | 0.06 | <1    |       |      | 703.80  | $\pm$ | 81.49  |
|       | Jun '11 | L016V  | 25.12 | $\pm$ | 3.17 | <2    |       |      | 0.65  | $\pm$ | 0.00 | 4.23  | $\pm$ | 0.80 | 1157.52 | $\pm$ | 218.05 |
|       |         | L017V  | 21.52 | $\pm$ | 2.09 | <2    |       |      | 0.57  | $\pm$ | 0.12 | <1    |       |      | 764.94  | $\pm$ | 98.04  |
|       |         | L022V  | 20.77 | $\pm$ | 2.14 | <2    |       |      | 0.50  | $\pm$ | 0.05 | <1    |       |      | 686.10  | $\pm$ | 32.08  |

|         |       |       |   |       |       |    |      |      |   |      |       |    |      |         |   |        |
|---------|-------|-------|---|-------|-------|----|------|------|---|------|-------|----|------|---------|---|--------|
| Nov '11 | L023V | 22.74 | ± | 2.28  |       | <2 |      | 0.50 | ± | 0.10 |       | <1 |      | 366.97  | ± | 58.10  |
|         | L016V | 54.40 | ± | 9.55  | 8.03  | ±  | 0.85 | 0.36 | ± | 0.05 | 13.87 | ±  | 1.78 | 1154.41 | ± | 236.64 |
|         | L017V | 23.93 | ± | 1.39  | 5.99  | ±  | 0.51 | 0.60 | ± | 0.04 | 10.04 | ±  | 0.30 | 1169.87 | ± | 225.30 |
| Jun '12 | L022V | 39.38 | ± | 2.06  | 10.72 | ±  | 1.32 | 0.57 | ± | 0.08 | 11.71 | ±  | 0.92 | 1299.89 | ± | 253.31 |
|         | L023V | 22.50 | ± | 2.36  | 13.02 | ±  | 2.86 | 0.13 | ± | 0.02 | 11.89 | ±  | 1.57 | 1382.17 | ± | 46.32  |
|         | L016V | 6.49  | ± | 1.87  | 4.62  | ±  | 0.33 | 0.66 | ± | 0.08 | 4.12  | ±  | 0.59 | 1092.98 | ± | 28.60  |
| Nov '12 | L017V | 10.48 | ± | 0.77  | 3.93  | ±  | 0.61 | 0.48 | ± | 0.05 | 7.66  | ±  | 2.95 | 1001.59 | ± | 107.19 |
|         | L022V | 13.96 | ± | 2.27  |       | <2 |      | 0.36 | ± | 0.04 |       | <1 |      | 143.46  | ± | 40.35  |
|         | L023V | 15.40 | ± | 2.14  |       | <2 |      | 0.49 | ± | 0.14 |       | <1 |      | 212.42  | ± | 56.08  |
| May '13 | L016V | 36.48 | ± | 15.20 | 3.03  | ±  | 0.56 | 0.92 | ± | 0.14 |       | <1 |      | 422.28  | ± | 104.89 |
|         | L017V | 44.08 | ± | 2.27  | 2.75  | ±  | 0.14 | 1.02 | ± | 0.19 |       | <1 |      | 648.32  | ± | 36.99  |
|         | L022V | 48.42 | ± | 10.64 |       | <2 |      | 0.98 | ± | 0.26 |       | <1 |      | 383.83  | ± | 90.21  |
| Nov '13 | L023V | 31.18 | ± | 1.95  |       | <2 |      | 0.81 | ± | 0.33 |       | <1 |      | 250.44  | ± | 48.63  |
|         | L016V | 15.71 | ± | 0.91  | 2.41  | ±  | 0.23 | 0.51 | ± | 0.05 | 2.66  | ±  | 0.34 | 464.33  | ± | 42.12  |
|         | L017V | 15.21 | ± | 2.08  | 2.40  | ±  | 0.26 | 0.66 | ± | 0.11 | 2.06  | ±  | 0.12 | 519.32  | ± | 60.47  |
| Jun '14 | L022V | 13.01 | ± | 1.68  |       | <2 |      | 0.44 | ± | 0.04 |       | <1 |      | 259.21  | ± | 282.73 |
|         | L023V | 10.25 | ± | 0.90  |       | <2 |      | 0.38 | ± | 0.05 |       | <1 |      | 90.50   | ± | 11.39  |
|         | L016V | 17.23 | ± | 3.23  | 9.14  | ±  | 1.73 | 0.58 | ± | 0.02 | 5.89  | ±  | 1.13 | 1209.40 | ± | 116.79 |
| Oct '14 | L017V | 22.07 | ± | 0.62  | 7.66  | ±  | 0.68 | 0.74 | ± | 0.06 | 15.73 | ±  | 5.06 | 1984.98 | ± | 148.69 |
|         | L022V | 15.43 | ± | 0.85  | 8.07  | ±  | 2.62 | 0.44 | ± | 0.10 | 8.10  | ±  | 0.79 | 1276.61 | ± | 243.71 |
|         | L023V | 17.97 | ± | 1.65  | 6.74  | ±  | 1.01 | 0.39 | ± | 0.03 | 7.63  | ±  | 1.09 | 1501.68 | ± | 198.78 |
| Jun '15 | L016V | 17.34 | ± | 1.13  | 0.96  | ±  | 0.26 | 0.57 | ± | 0.03 | 0.59  | ±  | 0.08 | 101.40  | ± | 11.45  |
|         | L017V | 21.04 | ± | 2.43  | 0.70  | ±  | 0.22 | 0.49 | ± | 0.03 | 0.37  | ±  | 0.02 | 83.58   | ± | 4.30   |
|         | L022V | 15.46 | ± | 1.68  | 0.92  | ±  | 0.05 | 0.67 | ± | 0.11 | 0.59  | ±  | 0.13 | 114.91  | ± | 3.40   |
| Oct '14 | L023V | 1.51  | ± | 0.12  | 0.85  | ±  | 0.09 | 0.49 | ± | 0.02 | 0.58  | ±  | 0.15 | 102.95  | ± | 7.73   |
|         | L016V | 27.59 | ± | 0.40  | 2.69  | ±  | 0.30 | 0.61 | ± | 0.04 | 4.56  | ±  | 0.64 | 782.85  | ± | 24.25  |
|         | L017V | 22.23 | ± | 1.32  | 2.74  | ±  | 0.05 | 0.49 | ± | 0.01 | 3.06  | ±  | 0.28 | 625.72  | ± | 19.42  |
| Jun '15 | L022V | 26.03 | ± | 2.80  | 3.59  | ±  | 0.62 | 0.62 | ± | 0.00 | 3.16  | ±  | 0.45 | 508.71  | ± | 13.06  |
|         | L023V | 24.41 | ± | 2.56  | 3.49  | ±  | 0.24 | 0.59 | ± | 0.03 | 3.72  | ±  | 0.21 | 614.26  | ± | 69.74  |
|         | L016V | 9.51  | ± | 0.56  | 3.77  | ±  | 0.35 | 0.50 | ± | 0.01 | 1.37  | ±  | 0.03 | 280.86  | ± | 31.00  |
| Jun '15 | L017V | 16.45 | ± | 1.60  | 3.10  | ±  | 0.34 | 0.49 | ± | 0.06 | 2.13  | ±  | 0.61 | 308.11  | ± | 12.35  |
|         | L022V | 15.04 | ± | 0.87  | 3.86  | ±  | 0.62 | 0.72 | ± | 0.11 | 1.79  | ±  | 0.28 | 322.16  | ± | 44.48  |
|         | L023V | 13.22 | ± | 1.87  | 3.78  | ±  | 0.38 | 0.73 | ± | 0.11 | 1.66  | ±  | 0.22 | 292.39  | ± | 25.22  |

**Table S2.** Bioaccumulation results (mean  $\pm$  dev. std.) of metals (Mn, Hg, Ni, Pb, Cu, Zn) in *R. philippinarum*

| Phase | Month   | Sample | Mn    |   |      | Hg    |   |       | Ni    |   |      | Pb    |   |      | Cu    |      |       | Zn     |      |       |
|-------|---------|--------|-------|---|------|-------|---|-------|-------|---|------|-------|---|------|-------|------|-------|--------|------|-------|
|       |         |        | mg/kg |   |      | mg/kg |   |       | mg/kg |   |      | mg/kg |   |      | mg/kg |      |       | mg/kg  |      |       |
| AO    | Nov '05 | L016V  | 29.83 | ± | 2.45 | 0.15  | ± | 0.012 | 8.85  | ± | 0.91 | 1.69  | ± | 0.21 | 6.18  | ±    | 0.70  | 56.53  | ±    | 6.29  |
|       |         | L017V  | 35.03 | ± | 4.26 | 0.17  | ± | 0.002 | 9.10  | ± | 0.21 | 2.03  | ± | 0.18 | 10.13 | ±    | 0.37  | 80.13  | ±    | 9.85  |
|       |         | L022V  | 35.46 | ± | 7.05 | 0.17  | ± | 0.025 | 11.52 | ± | 2.17 | 1.14  | ± | 0.11 | 12.94 | ±    | 2.01  | 83.00  | ±    | 6.34  |
|       |         | L023V  | 52.90 | ± | 7.49 | 0.21  | ± | 0.025 | 12.35 | ± | 2.04 | 1.35  | ± | 0.08 | 13.23 | ±    | 1.95  | 90.91  | ±    | 10.93 |
|       | Feb '06 | L016V  | 26.41 | ± | 3.54 | 0.16  | ± | 0.016 | 10.92 | ± | 0.93 | 0.73  | ± | 0.07 | 10.29 | ±    | 0.49  | 83.66  | ±    | 3.22  |
|       |         | L017V  | 35.92 | ± | 3.15 | 0.14  | ± | 0.028 | 9.60  | ± | 0.92 | 0.90  | ± | 0.17 | 11.54 | ±    | 1.22  | 81.12  | ±    | 8.53  |
|       |         | L022V  | 31.64 | ± | 7.27 | 0.24  | ± | 0.046 | 13.11 | ± | 1.69 | <0.05 |   | 9.86 | ±     | 0.65 | 78.10 | ±      | 1.70 |       |
|       |         | L023V  | 28.04 | ± | 4.31 | 0.17  | ± | 0.034 | 10.20 | ± | 1.56 | 0.68  | ± | 0.12 | 9.62  | ±    | 0.50  | 76.13  | ±    | 3.83  |
|       | Apr '06 | L016V  | 24.47 | ± | 4.50 | 0.11  | ± | 0.017 | 4.98  | ± | 0.99 | 0.96  | ± | 0.19 | 5.63  | ±    | 0.73  | 59.73  | ±    | 8.65  |
|       |         | L017V  | 20.51 | ± | 4.15 | 0.14  | ± | 0.008 | 4.54  | ± | 0.46 | 0.90  | ± | 0.18 | 5.89  | ±    | 0.16  | 68.48  | ±    | 3.19  |
|       |         | L022V  | 11.48 | ± | 0.96 | 0.11  | ± | 0.009 | 5.56  | ± | 0.64 | 0.70  | ± | 0.02 | 5.28  | ±    | 0.37  | 63.75  | ±    | 6.46  |
|       |         | L023V  | 19.52 | ± | 3.48 | 0.10  | ± | 0.001 | 6.10  | ± | 1.19 | 0.76  | ± | 0.09 | 6.12  | ±    | 0.08  | 65.86  | ±    | 6.41  |
|       | Jul '06 | L016V  | 36.56 | ± | 4.26 | 0.10  | ± | 0.005 | 8.09  | ± | 0.61 | 1.09  | ± | 0.13 | 7.96  | ±    | 0.64  | 70.62  | ±    | 7.98  |
|       |         | L017V  | 35.63 | ± | 8.12 | 0.09  | ± | 0.011 | 6.15  | ± | 0.59 | 0.92  | ± | 0.21 | 7.79  | ±    | 0.51  | 73.30  | ±    | 4.50  |
|       |         | L022V  | 26.10 | ± | 4.63 | 0.16  | ± | 0.037 | 7.84  | ± | 0.38 | 0.95  | ± | 0.17 | 7.91  | ±    | 1.19  | 65.00  | ±    | 5.64  |
|       |         | L023V  | 23.85 | ± | 3.56 | 0.10  | ± | 0.018 | 6.48  | ± | 0.79 | 0.94  | ± | 0.13 | 8.41  | ±    | 0.90  | 80.61  | ±    | 2.75  |
| IO    | Nov '06 | L016V  | 23.97 | ± | 0.90 | 0.12  | ± | 0.016 | 7.99  | ± | 0.69 | 16.91 | ± | 1.70 | 6.82  | ±    | 0.67  | 71.71  | ±    | 5.16  |
|       |         | L017V  | 39.78 | ± | 3.95 | 0.08  | ± | 0.007 | 6.46  | ± | 0.53 | 24.48 | ± | 2.76 | 7.78  | ±    | 0.39  | 70.90  | ±    | 3.92  |
|       |         | L022V  | 43.97 | ± | 5.00 | 0.12  | ± | 0.005 | 10.07 | ± | 0.53 | 24.07 | ± | 2.07 | 9.14  | ±    | 0.76  | 79.55  | ±    | 3.32  |
|       |         | L023V  | 29.58 | ± | 2.47 | 0.16  | ± | 0.013 | 8.29  | ± | 0.95 | 23.72 | ± | 1.81 | 8.81  | ±    | 0.74  | 79.26  | ±    | 3.30  |
|       | Feb '07 | L016V  | 51.20 | ± | 6.10 | 0.21  | ± | 0.019 | 11.43 | ± | 0.60 | 1.88  | ± | 0.18 | 11.79 | ±    | 1.29  | 88.74  | ±    | 5.64  |
|       |         | L017V  | 35.25 | ± | 3.78 | 0.19  | ± | 0.016 | 8.82  | ± | 0.94 | 1.90  | ± | 0.20 | 10.76 | ±    | 0.21  | 87.06  | ±    | 4.41  |
|       |         | L022V  | 37.62 | ± | 4.28 | 0.22  | ± | 0.027 | 11.56 | ± | 1.04 | 2.02  | ± | 0.18 | 11.89 | ±    | 0.81  | 83.79  | ±    | 4.38  |
|       |         | L023V  | 35.51 | ± | 3.19 | 0.23  | ± | 0.013 | 9.09  | ± | 0.92 | 0.97  | ± | 0.05 | 8.41  | ±    | 0.76  | 79.10  | ±    | 3.72  |
|       | Jun '08 | L016V  | 29.16 | ± | 5.00 | 0.13  | ± | 0.026 | 11.66 | ± | 1.40 | 1.73  | ± | 0.31 | 8.63  | ±    | 0.13  | 97.61  | ±    | 14.68 |
|       |         | L017V  | 33.02 | ± | 3.70 | 0.13  | ± | 0.009 | 7.05  | ± | 0.64 | 2.11  | ± | 0.30 | 8.05  | ±    | 0.21  | 102.57 | ±    | 6.48  |
|       |         | L022V  | 36.41 | ± | 3.05 | 0.16  | ± | 0.014 | 12.64 | ± | 1.07 | 1.96  | ± | 0.20 | 9.54  | ±    | 0.25  | 96.65  | ±    | 9.02  |
|       |         | L023V  | 36.17 | ± | 1.10 | 0.10  | ± | 0.032 | 8.17  | ± | 0.82 | 1.23  | ± | 0.53 | 8.68  | ±    | 0.28  | 90.66  | ±    | 16.08 |
|       | Nov '08 | L016V  | 21.06 | ± | 1.84 | 0.13  | ± | 0.012 | 11.64 | ± | 0.20 | 1.38  | ± | 0.15 | 10.52 | ±    | 0.44  | 94.70  | ±    | 1.70  |
|       |         | L017V  | 18.30 | ± | 1.44 | 0.08  | ± | 0.005 | 7.34  | ± | 1.01 | 0.76  | ± | 0.01 | 9.10  | ±    | 0.29  | 85.57  | ±    | 7.58  |
|       |         | L022V  | 23.87 | ± | 1.32 | 0.14  | ± | 0.009 | 11.61 | ± | 0.65 | 1.07  | ± | 0.08 | 10.86 | ±    | 0.83  | 98.73  | ±    | 7.72  |
|       |         | L023V  | 21.44 | ± | 2.09 | 0.08  | ± | 0.003 | 11.52 | ± | 1.31 | 0.82  | ± | 0.08 | 10.19 | ±    | 0.37  | 106.30 | ±    | 9.02  |
| PO    | Nov '10 | L016V  | 19.91 | ± | 1.48 |       |   |       | 12.49 | ± | 0.68 | 7.06  | ± | 0.84 | 10.08 | ±    | 0.60  | 107.97 | ±    | 10.12 |
|       |         | L017V  | 23.34 | ± | 1.67 |       |   |       | 8.91  | ± | 0.59 | 9.49  | ± | 1.11 | 10.53 | ±    | 1.20  | 92.08  | ±    | 8.10  |
|       |         | L022V  | 31.25 | ± | 5.68 |       |   |       | 14.91 | ± | 1.08 | 11.85 | ± | 1.38 | 14.04 | ±    | 1.59  | 115.03 | ±    | 12.87 |
|       |         | L023V  | 21.87 | ± | 2.57 |       |   |       | 13.32 | ± | 1.40 | 10.60 | ± | 0.83 | 13.34 | ±    | 0.72  | 105.60 | ±    | 1.77  |
|       | Jun '11 | L016V  | 27.09 | ± | 4.44 | 0.08  | ± | 0.010 | 6.88  | ± | 0.58 | 1.10  | ± | 0.04 | 10.24 | ±    | 0.92  | 87.28  | ±    | 7.82  |
|       |         | L017V  | 14.60 | ± | 1.91 | 0.10  | ± | 0.008 | 6.95  | ± | 0.79 | 1.29  | ± | 0.29 | 8.74  | ±    | 1.20  | 92.51  | ±    | 8.93  |
|       |         | L022V  | 15.46 | ± | 3.25 | 0.11  | ± | 0.015 | 6.78  | ± | 1.17 | 0.88  | ± | 0.04 | 9.63  | ±    | 0.56  | 83.85  | ±    | 12.75 |
|       |         | L023V  | 14.19 | ± | 2.11 | 0.06  | ± | 0.014 | 5.97  | ± | 0.70 | 0.83  | ± | 0.07 | 10.80 | ±    | 0.38  | 94.70  | ±    | 8.52  |
|       | Nov '11 | L016V  | 33.58 | ± | 4.38 | 0.13  | ± | 0.016 | 3.58  | ± | 0.55 | 1.24  | ± | 0.20 | 11.82 | ±    | 2.21  | 115.53 | ±    | 5.11  |

|         |       |       |        |      |         |       |        |      |        |       |        |        |         |
|---------|-------|-------|--------|------|---------|-------|--------|------|--------|-------|--------|--------|---------|
| Jun '12 | L017V | 26.57 | ± 4.77 | 0.15 | ± 0.003 | 3.09  | ± 0.55 | 1.39 | ± 0.14 | 12.44 | ± 1.23 | 104.36 | ± 1.24  |
|         | L022V | 45.74 | ± 9.55 | 0.13 | ± 0.002 | 5.11  | ± 0.71 | 1.49 | ± 0.26 | 15.36 | ± 1.48 | 97.08  | ± 11.40 |
|         | L023V | 50.18 | ± 2.75 | 0.11 | ± 0.008 | 5.27  | ± 0.25 | 1.52 | ± 0.18 | 13.93 | ± 0.14 | 108.08 | ± 13.59 |
|         | L016V | 28.65 | ± 2.90 | 0.11 | ± 0.018 | 8.23  | ± 0.43 | 0.33 | ± 0.02 | 10.20 | ± 0.85 | 88.72  | ± 6.13  |
| Nov '12 | L017V | 21.97 | ± 6.07 | 0.16 | ± 0.047 | 9.01  | ± 4.49 | 0.37 | ± 0.09 | 8.84  | ± 0.78 | 111.20 | ± 23.58 |
|         | L022V | 7.49  | ± 1.97 | 0.18 | ± 0.022 | 4.94  | ± 0.44 | 0.11 | ± 0.02 | 9.15  | ± 0.36 | 87.48  | ± 8.68  |
|         | L023V | 8.82  | ± 2.94 | 0.12 | ± 0.007 | 5.67  | ± 0.05 | 0.03 | ± 0    | 8.48  | ± 0.32 | 85.30  | ± 3.36  |
|         | L016V | 6.92  | ± 0.28 | 0.31 | ± 0.026 | 9.16  | ± 2.29 | 0.37 | ± 0.03 | 10.59 | ± 5.24 | 82.74  | ± 1.33  |
| May '13 | L017V | 3.66  | ± 0.14 | 0.25 | ± 0.017 | 8.66  | ± 1.25 | 0.43 | ± 0.09 | 8.11  | ± 0.89 | 98.09  | ± 6.73  |
|         | L022V | 9.49  | ± 3.32 | 0.26 | ± 0.038 | 10.81 | ± 0.42 | 0.46 | ± 0.06 | 11.85 | ± 1.55 | 85.13  | ± 6.75  |
|         | L023V | 4.92  | ± 0.62 | 0.27 | ± 0.042 | 10.86 | ± 1.13 | 0.36 | ± 0.11 | 9.18  | ± 1.10 | 87.64  | ± 9.18  |
|         | L016V | 12.80 | ± 1.54 | 0.15 | ± 0.013 | 7.72  | ± 1.01 | 0.12 | ± 0.02 | 7.06  | ± 0.75 | 73.50  | ± 2.87  |
| Nov '13 | L017V | 10.74 | ± 1.00 | 0.13 | ± 0.007 | 6.50  | ± 0.28 | 0.29 | ± 0.02 | 7.43  | ± 0.70 | 85.38  | ± 3.59  |
|         | L022V | 4.53  | ± 0.64 | 0.13 | ± 0.014 | 5.63  | ± 0.66 | 0.15 | ± 0.02 | 7.83  | ± 0.34 | 77.98  | ± 6.96  |
|         | L023V | 3.93  | ± 0.42 | 0.15 | ± 0.015 | 6.01  | ± 0.52 | 0.12 | ± 0.02 | 7.77  | ± 0.94 | 74.89  | ± 3.27  |
|         | L016V | 44.25 | ± 8.13 | 0.14 | ± 0.016 | 12.56 | ± 4.03 | 1.09 | ± 0.21 | 11.73 | ± 0.95 | 96.23  | ± 5.18  |
| Jun '14 | L017V | 50.43 | ± 2.33 | 0.14 | ± 0.003 | 12.45 | ± 0.78 | 1.60 | ± 0.14 | 12.16 | ± 0.80 | 89.31  | ± 5.15  |
|         | L022V | 41.42 | ± 7.34 | 0.11 | ± 0.007 | 9.95  | ± 0.26 | 1.15 | ± 0.10 | 10.48 | ± 0.87 | 89.59  | ± 2.78  |
|         | L023V | 44.22 | ± 4.11 | 0.11 | ± 0.004 | 8.32  | ± 0.40 | 1.18 | ± 0.07 | 11.48 | ± 1.08 | 86.03  | ± 1.73  |
|         | L016V | 5.50  | ± 0.90 | 0.11 | ± 0.005 | 3.01  | ± 1.16 | 0.71 | ± 0.18 | 1.51  | ± 0.17 | 40.96  | ± 6.60  |
| Oct '14 | L017V | 5.76  | ± 0.43 | 0.13 | ± 0.011 | 2.41  | ± 0.49 | 0.64 | ± 0.14 | 1.56  | ± 0.02 | 31.96  | ± 4.67  |
|         | L022V | 7.26  | ± 0.26 | 0.12 | ± 0.011 | 2.36  | ± 0.27 | 0.65 | ± 0.06 | 1.65  | ± 0.12 | 38.96  | ± 2.58  |
|         | L023V | 8.19  | ± 1.52 | 0.13 | ± 0.010 | 2.24  | ± 0.27 | 0.65 | ± 0.07 | 1.51  | ± 0.07 | 33.77  | ± 2.33  |
|         | L016V | 20.77 | ± 1.00 |      |         | 8.37  | ± 0.15 | 0.83 | ± 0.03 | 10.58 | ± 0.08 | 85.86  | ± 1.55  |
| Jun '15 | L017V | 16.93 | ± 0.39 |      |         | 7.62  | ± 0.22 | 0.67 | ± 0.02 | 10.57 | ± 0.04 | 97.83  | ± 1.11  |
|         | L022V | 15.48 | ± 0.07 |      |         | 8.21  | ± 0.20 | 0.60 | ± 0.01 | 9.89  | ± 0.01 | 103.92 | ± 1.02  |
|         | L023V | 18.65 | ± 1.23 |      |         | 8.03  | ± 0.28 | 0.77 | ± 0.02 | 11.54 | ± 0.12 | 104.02 | ± 1.47  |
|         | L016V | 16.51 | ± 2.20 |      |         | 10.08 | ± 0.49 | 0.52 | ± 0.06 | 10.65 | ± 0.34 | 112.49 | ± 6.98  |
|         | L017V | 12.07 | ± 2.84 |      |         | 11.57 | ± 0.65 | 0.55 | ± 0.07 | 8.94  | ± 0.73 | 130.87 | ± 7.15  |
|         | L022V | 14.76 | ± 2.37 |      |         | 10.76 | ± 1.14 | 0.62 | ± 0.07 | 9.66  | ± 0.46 | 136.53 | ± 16.99 |
|         | L023V | 13.90 | ± 1.65 |      |         | 14.59 | ± 2.02 | 0.74 | ± 0.11 | 10.46 | ± 0.17 | 126.82 | ± 12.31 |

**Table S3.** Bioaccumulation results (mean ± dev. std.) of BTs in *R. philippinarum* expressed as ng cation per gram of dry weight and as tin (Sn) per gram of dry weight

| Phase | Month   | Sample | MBT        | DBT        | TBT         | MBT        | DBT       | TBT         |
|-------|---------|--------|------------|------------|-------------|------------|-----------|-------------|
|       |         |        | ng cat/g   | ng cat/g   | ng cat/g    | ng Sn/g    | ng Sn/g   | ng Sn/g     |
| AO    | Nov '05 | L016V  | <6         | 15 ± 0.71  | 91 ± 2.12   | <4         | 7 ± 0.36  | 37 ± 0.87   |
|       |         | L017V  | <6         | 24 ± 0.71  | 154 ± 62.93 | <4         | 12 ± 0.36 | 63 ± 25.75  |
|       |         | L022V  | <6         | 20 ± 2.83  | 132 ± 36.06 | <4         | 10 ± 1.44 | 54 ± 14.76  |
|       |         | L023V  | <6         | 19 ± 3.54  | 90 ± 15.56  | <4         | 9 ± 1.80  | 37 ± 6.37   |
|       | Feb '06 | L016V  | 91 ± 15.50 | 35 ± 4.36  | 284 ± 34.59 | 61 ± 10.47 | 18 ± 2.22 | 116 ± 14.15 |
|       |         | L017V  | 19 ± 1.53  | 40 ± 4     | 343 ± 13.75 | 13 ± 1.03  | 20 ± 2.04 | 140 ± 5.63  |
|       |         | L022V  | 98 ± 13.61 | 45 ± 10.26 | 316 ± 7.77  | 66 ± 9.19  | 23 ± 5.23 | 129 ± 3.18  |
|       |         | L023V  | 97 ± 9.50  | 46 ± 2.31  | 315 ± 6.93  | 65 ± 6.42  | 24 ± 1.18 | 129 ± 2.84  |
|       | Apr '06 | L016V  | <6         | 14 ± 2.65  | 93 ± 8.54   | <4         | 7 ± 1.35  | 38 ± 3.50   |
|       |         |        |            |            |             |            |           |             |

|           |                |       |      |       |      |      |       |       |      |       |      |      |       |       |
|-----------|----------------|-------|------|-------|------|------|-------|-------|------|-------|------|------|-------|-------|
|           |                | L017V | <6   |       | 17 ± | 3    | 113 ± | 13.23 | <4   |       | 9 ±  | 1.53 | 46 ±  | 5.41  |
|           |                | L022V | <6   |       | 20 ± | 1.15 | 132 ± | 22.81 | <4   |       | 10 ± | 0.59 | 54 ±  | 9.33  |
|           |                | L023V | <6   |       | 24 ± | 5.80 | 190 ± | 37.42 | <4   |       | 12 ± | 2.96 | 74 ±  | 15.31 |
|           | <b>Jul '06</b> | L016V | 30 ± | 4.04  | 26 ± | 2.08 | 75 ±  | 6.66  | 20 ± | 2.73  | 13 ± | 1.06 | 31 ±  | 2.72  |
|           |                | L017V | 15 ± | 1     | 38 ± | 3.21 | 100 ± | 7.09  | 10 ± | 0.68  | 20 ± | 1.64 | 41 ±  | 2.90  |
|           |                | L022V | 18 ± | 0     | 37 ± | 5.29 | 94 ±  | 4.73  | 12 ± | 0.00  | 19 ± | 2.70 | 39 ±  | 1.93  |
|           |                | L023V | 20 ± | 3.06  | 35 ± | 3.79 | 107 ± | 5.51  | 14 ± | 2.06  | 18 ± | 1.93 | 44 ±  | 2.25  |
| <b>IO</b> | <b>Nov '06</b> | L016V | <6   |       | 19 ± | 1.15 | 123 ± | 5.03  | <4   |       | 10 ± | 0.59 | 50 ±  | 2.06  |
|           |                | L017V | <6   |       | 25 ± | 2    | 210 ± | 9.87  | <4   |       | 13 ± | 1.02 | 86 ±  | 4.04  |
|           |                | L022V | <6   |       | 25 ± | 3.51 | 193 ± | 14.01 | <4   |       | 13 ± | 1.79 | 79 ±  | 5.73  |
|           |                | L023V | <6   |       | 34 ± | 3.79 | 213 ± | 17.67 | <4   |       | 17 ± | 1.93 | 87 ±  | 7.23  |
|           | <b>Feb '07</b> | L016V | <6   |       | 33 ± | 0.58 | 276 ± | 5.29  | <4   |       | 17 ± | 0.29 | 113 ± | 2.17  |
|           |                | L017V | <6   |       | 32 ± | 2.52 | 367 ± | 22.01 | <4   |       | 16 ± | 1.28 | 150 ± | 9.01  |
|           |                | L022V | <6   |       | 35 ± | 2.52 | 344 ± | 16.92 | <4   |       | 18 ± | 1.28 | 141 ± | 6.92  |
|           |                | L023V | <6   |       | 34 ± | 4.51 | 358 ± | 25.32 | <4   |       | 17 ± | 2.30 | 147 ± | 10.36 |
|           | <b>Jun '08</b> | L016V | <6   |       | 24 ± | 3.06 | 104 ± | 9.54  | <4   |       | 12 ± | 1.56 | 43 ±  | 3.90  |
|           |                | L017V | 15 ± | 1.53  | 32 ± | 1.53 | 113 ± | 8.96  | 10 ± | 1.03  | 16 ± | 0.78 | 46 ±  | 3.67  |
|           |                | L022V | 15 ± | 2.65  | 32 ± | 1.15 | 101 ± | 1.53  | 10 ± | 1.79  | 16 ± | 0.59 | 41 ±  | 0.63  |
|           |                | L023V | 21 ± | 4.73  | 36 ± | 6.43 | 126 ± | 21.57 | 14 ± | 3.19  | 18 ± | 3.28 | 52 ±  | 8.83  |
|           | <b>Nov '08</b> | L016V | 15 ± | 2     | 32 ± | 1.15 | 138 ± | 1.15  | 10 ± | 1.35  | 16 ± | 0.59 | 57 ±  | 0.47  |
|           |                | L017V | <6   |       | 25 ± | 1    | 83 ±  | 6.93  | <4   |       | 13 ± | 0.51 | 34 ±  | 2.84  |
|           |                | L022V | 16 ± | 2.52  | 35 ± | 3.06 | 134 ± | 13.65 | 11 ± | 1.70  | 18 ± | 1.56 | 55 ±  | 5.59  |
|           |                | L023V | <6   |       | 20 ± | 1.15 | 74 ±  | 1.15  | <4   |       | 10 ± | 0.59 | 30 ±  | 0.47  |
| <b>PO</b> | <b>Nov '10</b> | L016V | 7    | 0.58  | 8 ±  | 3.21 | 32 ±  | 4.04  | 5 ±  | 0.39  | 5 ±  | 1.64 | 13 ±  | 1.65  |
|           |                | L017V | <6   |       | 8 ±  | 3.61 | 37 ±  | 1     | <4   |       | <4   |      | 15 ±  | 0.41  |
|           |                | L022V | 14 ± | 16.29 | 9 ±  | 1.53 | 38 ±  | 2.52  | 14 ± | 11.00 | 5 ±  | 0.78 | 16 ±  | 1.03  |
|           |                | L023V | 17 ± | 19.86 | 10 ± | 1    | 38 ±  | 3.61  | 17 ± | 13.41 | 5 ±  | 0.51 | 16 ±  | 1.48  |
|           | <b>Jun '11</b> | L016V | <6   |       | <8   |      | 20 ±  | 1.15  | <4   |       | <4   |      | 8 ±   | 0.47  |
|           |                | L017V | <6   |       | 7 ±  | 4.62 | 41 ±  | 4.36  | <4   |       | <4   |      | 17 ±  | 1.78  |
|           |                | L022V | 9 ±  | 6.66  | <8   |      | 37 ±  | 3.06  | 8 ±  | 4.50  | <4   |      | 15 ±  | 1.25  |
|           |                | L023V | 8 ±  | 9.24  | 9 ±  | 0.58 | 48 ±  | 1     | 13 ± | 6.24  | 5 ±  | 0.29 | 20 ±  | 0.41  |
|           | <b>Nov '11</b> | L016V | <6   |       | 12 ± | 1    | 33 ±  | 3.79  | 5 ±  | 1.95  | 6 ±  | 0.51 | 14 ±  | 1.55  |
|           |                | L017V | 9 ±  | 0.58  | 15 ± | 0    | 54 ±  | 3.06  | 6 ±  | 0.39  | 8 ±  |      | 22 ±  | 1.25  |
|           |                | L022V | <6   |       | 15 ± | 1.15 | 55 ±  | 5.20  | <4   |       | 8 ±  | 0.59 | 23 ±  | 2.13  |
|           |                | L023V | <6   |       | 13 ± | 3.21 | 51 ±  | 0.58  | 4 ±  | 1.17  | 7 ±  | 1.64 | 21 ±  | 0.24  |
|           | <b>Jun '12</b> | L016V | <6   |       | <8   |      | 19 ±  | 2.52  | <4   |       | <4   |      | 8 ±   | 1.03  |
|           |                | L017V | <6   |       | 11 ± | 1.73 | 24 ±  | 3     | <4   |       | 6 ±  | 0.88 | 10 ±  | 1.23  |
|           |                | L022V | <6   |       | 11 ± | 2    | 36 ±  | 2.08  | <4   |       | 6 ±  | 1.02 | 15 ±  | 0.85  |
|           |                | L023V | <6   |       | 9 ±  | 0.58 | 35 ±  | 6     | <4   |       | 5 ±  | 0.29 | 14 ±  | 2.46  |
|           | <b>Nov '12</b> | L016V | 6 ±  | 2.31  | 10 ± | 0.58 | 25 ±  | 2.65  | 5 ±  | 1.56  | 5 ±  | 0.29 | 10 ±  | 1.08  |
|           |                | L017V | 8 ±  | 1.53  | 15 ± | 2.52 | 40 ±  | 4.58  | 5 ±  | 1.03  | 8 ±  | 1.28 | 16 ±  | 1.88  |
|           |                | L022V | <6   |       | 14 ± | 1    | 36 ±  | 3.21  | <4   |       | 7 ±  | 0.51 | 15 ±  | 1.32  |
|           |                | L023V | <6   |       | 15 ± | 0.58 | 41 ±  | 3.21  | <4   |       | 8 ±  | 0.29 | 17 ±  | 1.32  |
|           | <b>May '13</b> | L016V | <6   |       | <8   |      | 25 ±  | 1     | <4   |       | <4   |      | 10 ±  | 0.41  |
|           |                | L017V | <6   |       | <8   |      | 33 ±  | 1.73  | <4   |       | <4   |      | 14 ±  | 0.71  |

|         |       |    |           |           |    |          |           |
|---------|-------|----|-----------|-----------|----|----------|-----------|
|         | L022V | <6 | <8        | 37 ± 2    | <4 | <4       | 15 ± 0.82 |
|         | L023V | <6 | <8        | 35 ± 3.79 | <4 | <4       | 14 ± 1.55 |
| Nov '13 | L016V | <6 | 13 ± 1    | 17 ± 2.52 | <4 | 7 ± 0.51 | 7 ± 1.03  |
|         | L017V | <6 | 15 ± 2    | 24 ± 1.53 | <4 | 8 ± 1.02 | 10 ± 0.63 |
|         | L022V | <6 | 13 ± 1    | 21 ± 0.58 | <4 | 7 ± 0.51 | 9 ± 0.24  |
|         | L023V | <6 | 13 ± 0.58 | 23 ± 1.73 | <4 | 7 ± 0.29 | 9 ± 0.71  |
| Jun '14 | L016V | <6 | <8        | 14 ± 0.58 | <4 | <4       | 6 ± 0.24  |
|         | L017V | <6 | <8        | 23 ± 2.08 | <4 | <4       | 9 ± 0.85  |
|         | L022V | <6 | <8        | 24 ± 1.73 | <4 | <4       | 10 ± 0.71 |
|         | L023V | <6 | <8        | 32 ± 4.36 | <4 | <4       | 13 ± 1.78 |
| Oct '14 | L016V | <6 | <8        | 23 ± 1.53 | <4 | <4       | 10 ± 0.63 |
|         | L017V | <6 | <8        | 29 ± 1.15 | <4 | <4       | 12 ± 0.47 |
|         | L022V | <6 | <8        | 22 ± 1.73 | <4 | <4       | 9 ± 0.71  |
|         | L023V | <6 | 8 ± 4.04  | 27 ± 2.89 | <4 | 4 ± 2.06 | 11 ± 1.18 |
| Jun '15 | L016V | <6 | <8        | 25 ± 3.79 | <4 | <4       | 10 ± 1.55 |
|         | L017V | <6 | <8        | 41 ± 4.58 | <4 | <4       | 17 ± 1.88 |
|         | L022V | <6 | <8        | 35 ± 5.29 | <4 | <4       | 14 ± 2.17 |
|         | L023V | <6 | <8        | 41 ± 4.04 | <4 | <4       | 17 ± 1.65 |

AO = ante operam, IO = in opera, PO = post operam

**Table S4.** Results of biomarkers (mean ± dev. std.) analysed in Manila clams (*R. philippinarum*) in Vallona Lagoon.

| Phase | Month   | Sample | MN        |        | AChE        |         | AOX      |        | CAT         |         | TOSC_ROO       |          | TOSC_HO        |          | MDA           |         |
|-------|---------|--------|-----------|--------|-------------|---------|----------|--------|-------------|---------|----------------|----------|----------------|----------|---------------|---------|
|       |         |        | frequency |        | nmol/min/mg |         | mUnit/ml |        | µmol/min/mg |         | UTOSC/ mg prot |          | UTOSC/ mg prot |          | nmol/g tissue |         |
|       |         |        | (‰)       |        | prot.       |         |          |        | prot.       |         |                |          |                |          |               |         |
| AO    | Nov '05 | L016V  | 0.20      | ± 0.13 | 20.81       | ± 13.70 | 0.83     | ± 0.21 | 31.41       | ± 9.24  | 420.27         | ± 69.67  | 299.62         | ± 73.42  | 19.33         | ± 4.19  |
|       |         | L017V  | 0.20      | ± 0.13 | 12.80       | ± 5.40  | 0.81     | ± 0.27 | 32.69       | ± 11.76 | 324.84         | ± 28.59  | 214.66         | ± 55.38  | 38.75         | ± 6.29  |
|       |         | L022V  | 0.80      | ± 0.25 | 21.58       | ± 8.69  | 0.97     | ± 0.25 | 34.66       | ± 8.89  | 372.01         | ± 80.55  | 258.60         | ± 75.11  | 30.25         | ± 8.13  |
|       |         | L023V  | 0.40      | ± 0.16 | 11.98       | ± 4.16  | 0.66     | ± 0.26 | 27.53       | ± 4.51  | 354.91         | ± 50.86  | 159.78         | ± 20.56  | 39.06         | ± 17.84 |
|       | Feb '06 | L016V  | 0.20      | ± 0.13 | 15.39       | ± 3.59  | 0.69     | ± 0.38 | 39.24       | ± 17.70 | 368.36         | ± 53.24  | 276.25         | ± 12.64  | 39.17         | ± 7.65  |
|       |         | L017V  | 0         |        | 15.58       | ± 3.80  | 1.06     | ± 0.15 | 45.17       | ± 6.91  | 645.33         | ± 107.69 | 348.42         | ± 45.09  | 32.5          | ± 24.58 |
|       |         | L022V  | 0         |        | 12.11       | ± 4.43  | 0.99     | ± 0.20 | 42.04       | ± 7.82  | 391.93         | ± 45.06  | 382.74         | ± 41.93  | 23.17         | ± 1.44  |
|       |         | L023V  | 0         |        | 11.83       | ± 6.02  | 1.40     | ± 0.28 | 36.90       | ± 5.46  | 696.49         | ± 117.44 | 456.74         | ± 33.76  | 24.33         | ± 8.37  |
|       | Apr '06 | L016V  | 0.20      | ± 0.13 | 11.27       | ± 1.85  | 0.98     | ± 0.06 | 44.01       | ± 9.98  | 534.89         | ± 74.62  | 463.87         | ± 63.00  | 17            | ± 5.77  |
|       |         | L017V  | 0.30      | ± 0.15 | 10.05       | ± 1.12  | 0.99     | ± 0.30 | 36.00       | ± 9.38  | 409.16         | ± 49.16  | 495.94         | ± 53.39  | 18            | ± 6.56  |
|       |         | L022V  | 0.10      | ± 0.10 | 10.05       | ± 3.06  | 1.12     | ± 0.45 | 32.82       | ± 1.55  | 638.40         | ± 143.46 | 323.28         | ± 58.33  | 18.67         | ± 2.36  |
|       |         | L023V  | 0         |        | 10.05       | ± 1.53  | 1.24     | ± 0.25 | 42.41       | ± 2.24  | 656.96         | ± 79.77  | 442.79         | ± 148.72 | 27.17         | ± 4.75  |
|       | Jul '06 | L016V  | 0.60      | ± 0.31 | 10.07       | ± 0.29  | 0.88     | ± 0.07 | 17.44       | ± 6.87  | 640.81         | ± 47.27  | 378.31         | ± 108.74 | 31.5          | ± 4.58  |
|       |         | L017V  | 0         |        | 12.71       | ± 1.61  | 0.78     | ± 0.22 | 31.76       | ± 5.03  | 626.97         | ± 90.43  | 355.43         | ± 114.15 | 29.67         | ± 3.40  |
|       |         | L022V  | 0.60      | ± 0.16 | 13.44       | ± 4.91  | 1.01     | ± 0.07 | 24.79       | ± 3.46  | 395.55         | ± 83.77  | 388.97         | ± 50.20  | 35.17         | ± 10.75 |
|       |         | L023V  | 0.20      | ± 0.13 | 18.11       | ± 8.35  | 0.90     | ± 0.22 | 23.92       | ± 2.77  | 448.62         | ± 168.67 | 430.47         | ± 14.74  | 28.5          | ± 9.34  |
| IO    | Nov '06 | L016V  | 0.88      | ± 0.23 | 9.92        | ± 0.95  | 1.17     | ± 0.06 | 34.45       | ± 4.97  | 397.11         | ± 60.59  | 462.64         | ± 49.28  | 18.27         | ± 3.36  |
|       |         | L017V  | 0.75      | ± 0.16 | 19.19       | ± 2.93  | 1.22     | ± 0.05 | 39.71       | ± 3.16  | 329.68         | ± 48.91  | 448.94         | ± 82.14  | 16.07         | ± 3.84  |
|       |         | L022V  | 1.00      | ± 0.27 | 17.09       | ± 1.75  | 1.10     | ± 0.05 | 36.19       | ± 4.80  | 554.26         | ± 76.85  | 538.92         | ± 52.25  | 19.39         | ± 4.02  |
|       |         | L023V  | 0.75      | ± 0.14 | 11.57       | ± 3.93  | 1.06     | ± 0.34 | 42.23       | ± 6.61  | 391.06         | ± 61.91  | 381.06         | ± 57.55  | 18.38         | ± 4.89  |
|       | Feb '07 | L016V  | 0.25      | ± 0.16 | 13.82       | ± 2.60  | 1.25     | ± 0.04 | 33.59       | ± 10.16 | 465.95         | ± 57.70  | 441.19         | ± 51.59  | 23.42         | ± 4.61  |

|           |                |       |      |        |       |         |      |        |       |         |        |          |        |          |       |         |
|-----------|----------------|-------|------|--------|-------|---------|------|--------|-------|---------|--------|----------|--------|----------|-------|---------|
|           |                | L017V | 0.25 | ± 0.16 | 17.78 | ± 3.40  | 1.39 | ± 0.10 | 41.34 | ± 3.38  | 385.30 | ± 30.81  | 526.36 | ± 14.94  | 21.49 | ± 1.39  |
|           |                | L022V | 0.14 | ± 0.14 | 20.16 | ± 5.91  | 1.28 | ± 0.09 | 43.70 | ± 7.70  | 470.72 | ± 65.39  | 503.65 | ± 62.61  | 33.67 | ± 4.93  |
|           |                | L023V | 0.75 | ± 0.37 | 17.20 | ± 4.06  | 1.39 | ± 0.17 | 34.03 | ± 5.02  | 356.46 | ± 45.11  | 478.56 | ± 60.05  | 28.55 | ± 6.25  |
|           | <b>Jun '08</b> | L016V | 0.33 | ± 0.33 | 12.95 | ± 0.83  | 0.93 | ± 0.16 | 45.22 | ± 4.26  | 442.24 | ± 54.06  | 562.10 | ± 45.31  | 48.14 | ± 6.63  |
|           |                | L017V | 0.25 | ± 0.25 | 17.70 | ± 3.42  | 0.93 | ± 0.05 | 41.92 | ± 10.17 | 434.99 | ± 105.70 | 538.84 | ± 22.62  | 36.83 | ± 6.81  |
|           |                | L022V | 0.50 | ± 0.5  | 12.56 | ± 1.40  | 0.84 | ± 0.08 | 53.67 | ± 10.53 | 405.79 | ± 94.52  | 504.43 | ± 50.83  | 30.62 | ± 5.46  |
|           |                | L023V | 0    |        | 20.72 | ± 0.98  | 0.94 | ± 0.10 | 65.92 | ± 6.14  | 396.64 | ± 73.78  | 489.63 | ± 101.43 | 36.47 | ± 3.58  |
|           | <b>Nov '08</b> | L016V | 0.60 | ± 0.24 | 8.91  | ± 0.68  | 0.55 | ± 0.18 | 27.07 | ± 4.35  | 494.20 | ± 108.83 | 464.46 | ± 11.97  | 36.14 | ± 2.96  |
|           |                | L017V | 1.20 | ± 0.37 | 12.87 | ± 1.20  | 0.64 | ± 0.14 | 25.59 | ± 5.20  | 449.04 | ± 32.66  | 450.84 | ± 94.17  | 49.50 | ± 7.23  |
|           |                | L022V | 0.20 | ± 0.20 | 12.22 | ± 0.59  | 0.53 | ± 0.04 | 30.35 | ± 10.39 | 369.89 | ± 141.77 | 428.88 | ± 66.17  | 34.96 | ± 2.69  |
|           |                | L023V | 0.75 | ± 0.48 | 8.80  | ± 1.40  | 0.64 | ± 0.09 | 33.31 | ± 10.22 | 392.92 | ± 37.02  | 550.04 | ± 68.72  | 51.44 | ± 15.80 |
| <b>PO</b> | <b>Nov '10</b> | L016V | 0.60 | ± 0.22 | 5.63  | ± 1.28  | 0.30 | ± 0.15 | 11.41 | ± 2.15  | 325.09 | ± 44.05  | 326.75 | ± 73.07  | 37    | ± 5.70  |
|           |                | L017V | 0.60 | ± 0.16 | 3.53  | ± 0.62  | 0.34 | ± 0.11 | 11.41 | ± 2.48  | 341.23 | ± 41.09  | 366.87 | ± 38.22  | 35    | ± 7.91  |
|           |                | L022V | 0.80 | ± 0.33 | 4.90  | ± 1.84  | 0.36 | ± 0.15 | 11.66 | ± 0.88  | 328.54 | ± 24.10  | 388.49 | ± 32.89  | 37    | ± 8.37  |
|           |                | L023V | 1.10 | ± 0.28 | 5.60  | ± 2.25  | 0.36 | ± 0.11 | 9.86  | ± 1.06  | 340.38 | ± 11.55  | 333.42 | ± 45.83  | 37    | ± 8.37  |
|           | <b>Jun '11</b> | L016V | 0.25 | ± 0.16 | 1.45  | ± 0.29  | 0.34 | ± 0.09 | 17.88 | ± 5.52  | 515.82 | ± 63.33  | 483.75 | ± 207.49 | 37.4  | ± 8.14  |
|           |                | L017V | 0.38 | ± 0.18 | 1.67  | ± 0.42  | 0.33 | ± 0.05 | 15.88 | ± 5.67  | 436.52 | ± 61.74  | 504.60 | ± 135.47 | 35    | ± 0     |
|           |                | L022V | 0.38 | ± 0.18 | 1.84  | ± 0.52  | 0.36 | ± 0.06 | 22.56 | ± 7.26  | 508.14 | ± 49.99  | 470.23 | ± 94.74  | 40    | ± 3.54  |
|           |                | L023V | 0.25 | ± 0.16 | 1.61  | ± 0.48  | 0.33 | ± 0.06 | 21.54 | ± 3.56  | 466.30 | ± 64.34  | 366.76 | ± 72.65  | 34.17 | ± 2.04  |
|           | <b>Nov '11</b> | L016V | 0.25 | ± 0.16 | 2.78  | ± 0.87  | 0.77 | ± 0.22 | 18.64 | ± 3.54  | 362.99 | ± 93.35  | 462.36 | ± 95.92  | 41.33 | ± 24.43 |
|           |                | L017V | 0.13 | ± 0.13 | 2.18  | ± 0.37  | 1.00 | ± 0.28 | 17.35 | ± 3.98  | 347.57 | ± 65.29  | 349.78 | ± 80.16  | 33.33 | ± 16.63 |
|           |                | L022V | 0.38 | ± 0.18 | 2.72  | ± 1.08  | 1.29 | ± 0.28 | 14.14 | ± 2.84  | 355.42 | ± 46.05  | 360.72 | ± 70.53  | 70    | ± 10.49 |
|           |                | L023V | 0.50 | ± 0.19 | 4.04  | ± 0.68  | 1.24 | ± 0.22 | 15.39 | ± 2.78  | 344.16 | ± 41.72  | 371.66 | ± 63.91  | 59.17 | ± 13.93 |
|           | <b>Jun '12</b> | L016V | 0.25 | ± 0.16 | 11.42 | ± 3.60  | 1.22 | ± 0.35 | 9.73  | ± 2.10  | 364.86 | ± 22.63  | 309.80 | ± 21.89  | 36.5  | ± 19.59 |
|           |                | L017V | 0.25 | ± 0.16 | 4.81  | ± 2.35  | 1.24 | ± 0.45 | 9.24  | ± 2.18  | 341.76 | ± 48.48  | 306.13 | ± 31.89  | 28.33 | ± 7.53  |
|           |                | L022V | 0.25 | ± 0.16 | 6.57  | ± 2.70  | 1.41 | ± 0.61 | 10.73 | ± 3.14  | 324.69 | ± 72.01  | 328.07 | ± 30.53  | 60.71 | ± 14.56 |
|           |                | L023V | 0.13 | ± 0.13 | 4.85  | ± 1.90  | 1.05 | ± 0.34 | 11.40 | ± 1.74  | 277.91 | ± 83.88  | 318.78 | ± 24.19  | 70.71 | ± 14.56 |
|           | <b>Nov '12</b> | L016V | 0.20 | ± 0.13 | 13.64 | ± 3.15  | 0.55 | ± 0.18 | 24.94 | ± 2.88  | 701.27 | ± 174.53 | 591.22 | ± 163.20 | 22.86 | ± 6.36  |
|           |                | L017V | 0.40 | ± 0.16 | 10.81 | ± 3.64  | 0.56 | ± 0.25 | 26.61 | ± 5.63  | 751.97 | ± 66.06  | 633.86 | ± 79.76  | 23.57 | ± 9.00  |
|           |                | L022V | 0.60 | ± 0.22 | 10.92 | ± 3.41  | 0.53 | ± 0.16 | 21.99 | ± 6.04  | 668.79 | ± 82.01  | 508.35 | ± 62.78  | 30    | ± 10.80 |
|           |                | L023V | 0.50 | ± 0.17 | 8.98  | ± 2.25  | 0.51 | ± 0.20 | 24.00 | ± 6.18  | 679.72 | ± 111.95 | 487.18 | ± 67.55  | 34.29 | ± 11.34 |
|           | <b>May '13</b> | L016V | 0.25 | ± 0.16 | 14.01 | ± 5.48  | 1.71 | ± 0.28 | 90.08 | ± 16.94 | 588.32 | ± 75.89  | 889.97 | ± 121.81 | 58.72 | ± 10.73 |
|           |                | L017V | 0.88 | ± 0.23 | 18.04 | ± 7.70  | 1.75 | ± 0.38 | 80.46 | ± 13.91 | 474.00 | ± 39.87  | 731.91 | ± 79.92  | 55.37 | ± 11.25 |
|           |                | L022V | 0.50 | ± 0.19 | 15.13 | ± 5.76  | 1.86 | ± 0.15 | 77.16 | ± 11.59 | 473.23 | ± 29.22  | 742.29 | ± 44.86  | 58.98 | ± 14.48 |
|           |                | L023V | 0.38 | ± 0.18 | 10.51 | ± 2.35  | 1.31 | ± 0.34 | 79.08 | ± 12.83 | 445.95 | ± 57.54  | 730.22 | ± 61.22  | 47.76 | ± 9.07  |
|           | <b>Nov '13</b> | L016V | 0.25 | ± 0.16 | 16.28 | ± 4.57  | 1.24 | ± 0.36 | 61.38 | ± 19.35 | 902.69 | ± 79.51  | 739.80 | ± 172.19 | 24.96 | ± 7.25  |
|           |                | L017V | 0.38 | ± 0.18 | 12.44 | ± 5.18  | 1.30 | ± 0.20 | 57.65 | ± 16.39 | 811.06 | ± 117.59 | 587.89 | ± 140.49 | 28.28 | ± 5.76  |
|           |                | L022V | 0.13 | ± 0.13 | 18.30 | ± 2.08  | 1.74 | ± 0.21 | 55.58 | ± 14.66 | 801.57 | ± 127.03 | 609.02 | ± 73.54  | 30.10 | ± 7.28  |
|           |                | L023V | 0.25 | ± 0.25 | 14.77 | ± 7.84  | 1.56 | ± 0.15 | 69.15 | ± 15.35 | 855.41 | ± 215.41 | 644.80 | ± 171.21 | 23.84 | ± 4.25  |
|           | <b>Jun '14</b> | L016V | 0.25 | ± 0.25 | 22.05 | ± 12.94 | 1.47 | ± 0.43 | 40.24 | ± 17.74 | 494.40 | ± 90.73  | 481.79 | ± 94.59  | 63.03 | ± 14.63 |
|           |                | L017V | 0.38 | ± 0.18 | 40.38 | ± 13.68 | 1.39 | ± 0.35 | 30.91 | ± 11.95 | 536.27 | ± 50.01  | 459.73 | ± 115.03 | 47.62 | ± 11.14 |
|           |                | L022V | 0.13 | ± 0.13 | 37.21 | ± 14.83 | 1.19 | ± 0.36 | 36.10 | ± 13.16 | 547.19 | ± 117.88 | 465.21 | ± 78.22  | 61.47 | ± 13.81 |
|           |                | L023V | 0.25 | ± 0.16 | 35.98 | ± 8.34  | 1.49 | ± 0.41 | 35.22 | ± 4.46  | 566.31 | ± 113.37 | 466.72 | ± 95.02  | 65.75 | ± 17.44 |
|           | <b>Oct '14</b> | L016V | 0.38 | ± 0.18 | 8.99  | ± 3.28  | 2.03 | ± 0.48 | 41.75 | ± 6.55  | 550.64 | ± 65.43  | 656.28 | ± 58.86  | 20.58 | ± 3.80  |
|           |                | L017V | 0.50 | ± 0.19 | 8.51  | ± 1.99  | 1.32 | ± 0.25 | 40.18 | ± 6.27  | 689.24 | ± 156.67 | 704.65 | ± 20.70  | 18.68 | ± 8.95  |

|                |       |      |        |       |        |      |        |       |         |        |          |        |          |       |        |
|----------------|-------|------|--------|-------|--------|------|--------|-------|---------|--------|----------|--------|----------|-------|--------|
|                | L022V | 0.25 | ± 0.16 | 8.31  | ± 1.92 | 1.56 | ± 0.59 | 38.81 | ± 11.57 | 800.17 | ± 100.21 | 736.72 | ± 99.02  | 19.27 | ± 4.53 |
|                | L023V | 0.13 | ± 0.13 | 7.34  | ± 1.81 | 2.05 | ± 0.77 | 44.25 | ± 6.56  | 721.37 | ± 201.92 | 742.51 | ± 97.12  | 22.24 | ± 4.94 |
| <b>Jun '15</b> | L016V | 0.38 | ± 0.18 | 11.75 | ± 2.70 | 1.66 | ± 0.42 | 43.82 | ± 4.65  | 775.98 | ± 122.67 | 867.61 | ± 52.71  | 19.55 | ± 4.87 |
|                | L017V | 0.63 | ± 0.26 | 11.96 | ± 4.19 | 1.25 | ± 0.24 | 40.08 | ± 3.34  | 626.43 | ± 83.19  | 796.67 | ± 54.95  | 19.92 | ± 6.00 |
|                | L022V | 0.63 | ± 0.26 | 9.34  | ± 2.31 | 1.52 | ± 0.20 | 45.32 | ± 4.27  | 730.74 | ± 171.70 | 856.51 | ± 115.20 | 22.91 | ± 6.25 |
|                | L023V | 0.50 | ± 0.19 | 7.44  | ± 2.45 | 1.13 | ± 0.33 | 36.37 | ± 6.32  | 530.96 | ± 186.18 | 633.40 | ± 168.44 | 21.27 | ± 4.93 |

---

AO = ante operam, IO = in opera, PO = post operam



**Table S5.** Values of R Spearman's correlations resulted significant ( $p<0.05$ ). Positive correlations are in blue, negative ones in red.

1

|                  | Ba    | As    | Cd    | Cr   | Fe    | Mn    | Hg    | Ni    | Pb    | Cu    | Zn    | MBT   | DBT   | TBT   | HMW PAHs | AChE | AOX  | CAT   | MN   | MDA   | TOSC_HO | TOSC_ROO | CI    |
|------------------|-------|-------|-------|------|-------|-------|-------|-------|-------|-------|-------|-------|-------|-------|----------|------|------|-------|------|-------|---------|----------|-------|
| As               | n.s.  |       |       |      |       |       |       |       |       |       |       |       |       |       |          |      |      |       |      |       |         |          |       |
| Cd               | n.s.  | 0.40  |       |      |       |       |       |       |       |       |       |       |       |       |          |      |      |       |      |       |         |          |       |
| Cr               | 0.70  | n.s.  | n.s.  |      |       |       |       |       |       |       |       |       |       |       |          |      |      |       |      |       |         |          |       |
| Fe               | 0.72  | n.s.  | 0.24  | 0.82 |       |       |       |       |       |       |       |       |       |       |          |      |      |       |      |       |         |          |       |
| Mn               | 0.72  | n.s.  | n.s.  | 0.82 | n.s.  |       |       |       |       |       |       |       |       |       |          |      |      |       |      |       |         |          |       |
| Hg               | n.s.  | 0.35  | 0.55  | n.s. | n.s.  | n.s.  |       |       |       |       |       |       |       |       |          |      |      |       |      |       |         |          |       |
| Ni               | 0.45  | n.s.  | 0.41  | n.s. | n.s.  | n.s.  | n.s.  |       |       |       |       |       |       |       |          |      |      |       |      |       |         |          |       |
| Pb               | 0.38  | 0.24  | n.s.  | 0.49 | n.s.  | n.s.  | n.s.  | n.s.  |       |       |       |       |       |       |          |      |      |       |      |       |         |          |       |
| Cu               | 0.59  | 0.41  | 0.34  | 0.37 | 0.52  | 0.44  | 0.24  | 0.50  | 0.31  |       |       |       |       |       |          |      |      |       |      |       |         |          |       |
| Zn               | 0.33  | 0.26  | n.s.  | n.s. | n.s.  | n.s.  | n.s.  | n.s.  | n.s.  | n.s.  |       |       |       |       |          |      |      |       |      |       |         |          |       |
| MBT              | n.s.  | n.s.  | n.s.  | n.s. | n.s.  | n.s.  | n.s.  | n.s.  | n.s.  | n.s.  | n.s.  |       |       |       |          |      |      |       |      |       |         |          |       |
| DBT              | n.s.  | n.s.  | n.s.  | 0.41 | 0.46  | 0.58  | 0.28  | 0.27  | 0.35  | n.s.  | n.s.  | 0.46  |       |       |          |      |      |       |      |       |         |          |       |
| TBT              | n.s.  | n.s.  | n.s.  | 0.28 | 0.35  | 0.40  | n.s.  | n.s.  | n.s.  | n.s.  | n.s.  | 0.32  | 0.82  |       |          |      |      |       |      |       |         |          |       |
| HMW_PAH          | n.s.  | n.s.  | n.s.  | 0.32 | 0.45  | 0.45  | 0.32  | 0.26  | 0.49  | n.s.  | n.s.  | n.s.  | 0.68  | 0.68  |          |      |      |       |      |       |         |          |       |
| AChE             | n.s.  | -0.31 | n.s.  | n.s. | n.s.  | n.s.  | n.s.  | n.s.  | n.s.  | n.s.  | n.s.  | n.s.  | 0.28  | n.s.  | 0.24     |      |      |       |      |       |         |          |       |
| AOX              | n.s.  | n.s.  | n.s.  | n.s. | n.s.  | n.s.  | n.s.  | n.s.  | n.s.  | n.s.  | n.s.  | -0.48 | -0.23 | -0.24 | -0.44    | 0.37 |      |       |      |       |         |          |       |
| CAT              | n.s.  | n.s.  | n.s.  | n.s. | n.s.  | n.s.  | n.s.  | n.s.  | n.s.  | n.s.  | n.s.  | -0.23 | n.s.  | n.s.  | n.s.     | 0.57 | 0.58 |       |      |       |         |          |       |
| MN               | n.s.  | 0.23  | n.s.  | n.s. | n.s.  | n.s.  | n.s.  | n.s.  | n.s.  | n.s.  | n.s.  | n.s.  | n.s.  | n.s.  | n.s.     | n.s. | n.s. | n.s.  |      |       |         |          |       |
| MDA              | n.s.  | n.s.  | n.s.  | n.s. | n.s.  | n.s.  | n.s.  | -0.25 | n.s.  | n.s.  | n.s.  | n.s.  | n.s.  | -0.24 | n.s.     | n.s. | n.s. | -0.27 | n.s. |       |         |          |       |
| TOSC_HO          | n.s.  | n.s.  | n.s.  | n.s. | -0.27 | -0.27 | -0.23 | n.s.  | n.s.  | n.s.  | n.s.  | -0.35 | -0.38 | -0.38 | -0.42    | n.s. | n.s. | 0.61  | n.s. | n.s.  |         |          |       |
| TOSC_ROO         | n.s.  | n.s.  | n.s.  | n.s. | -0.31 | n.s.  | -0.24 | n.s.  | -0.34 | n.s.  | n.s.  | n.s.  | n.s.  | -0.32 | -0.28    | n.s. | n.s. | 0.50  | n.s. | -0.36 | 0.65    |          |       |
| CI               | -0.42 | -0.52 | -0.47 | n.s. | -0.44 | n.s.  | -0.56 | -0.42 | -0.34 | -0.61 | -0.34 | n.s.  | n.s.  | n.s.  | n.s.     | n.s. | n.s. | 0.26  | n.s. | n.s.  | n.s.    | n.s.     |       |
| LT <sub>50</sub> | 0.25  | 0.40  | n.s.  | 0.29 | 0.27  | n.s.  | 0.45  | n.s.  | n.s.  | 0.27  | n.s.  | n.s.  | n.s.  | n.s.  | 0.30     | n.s. | n.s. | n.s.  | n.s. | n.s.  | n.s.    | n.s.     | -0.34 |

n.s. = not significant

2
